# Supplementary material for: The Effectiveness of Planning Interventions for Improving Physical Activity in the General Population: A Systematic Review and Meta-Analysis of Randomized Controlled Trials
Source: Int J Environ Res Public Health. 2022 Jun 15;19(12):7337. doi: 10.3390/ijerph19127337 (PMC9223740; doi:10.3390/ijerph19127337)
Supplement: Supplementary file 1 [file ijerph-19-07337-s001.zip]

Archive with 4 entries (4 files):
- Figure S1 Funnel plot.tif
- Figure S2 Egger plot.tif
- PRISMA 2020 Checklist.pdf
- Search strategy.pdf
